# Supplementary material for: VO2 phase change electrodes in Li-ion batteries
Source: Royal Society of Chemistry journal article supplement (doi:10.1039/d3ta06286d), 2023-12-04
Supplement: d3ta06286d1.pdf [file d3ta06286d1.pdf]

## Supporting information

### VO<sub>2</sub> Phase Change Electrodes in Li-ion Batteries

Samuel Castro-Pardo<sup>1,2</sup>, Anand B. Puthirath<sup>1\*</sup>, Shaoxun Fan<sup>1</sup>, Sreehari Saju<sup>1</sup>, Guang Yang<sup>3</sup>, Jagjit Nanda<sup>3,4</sup>, Robert Vajtai<sup>1</sup>, Ming Tang<sup>1</sup>, Pulickel M. Ajayan<sup>1\*</sup>

<sup>1</sup> Department of Materials Science and NanoEngineering, Rice University, 6100 Main St., Houston, TX 77005, USA

<sup>2</sup> Department of Chemistry, Rice University, 6100 Main St., Houston, TX 77005, USA

<sup>3</sup> Chemical Sciences Division, Oak Ridge National Laboratory, 1 Bethel Valley Rd, Oak Ridge, TN 37830

<sup>4</sup> SLAC National Lab and Stanford University, 2575 Sand Hill Road, Menlo Park, CA 94025, USA

**\*Corresponding Authors:** [anandputhirath@rice.edu](mailto:anandputhirath@rice.edu) and [ajayan@rice.edu](mailto:ajayan@rice.edu)

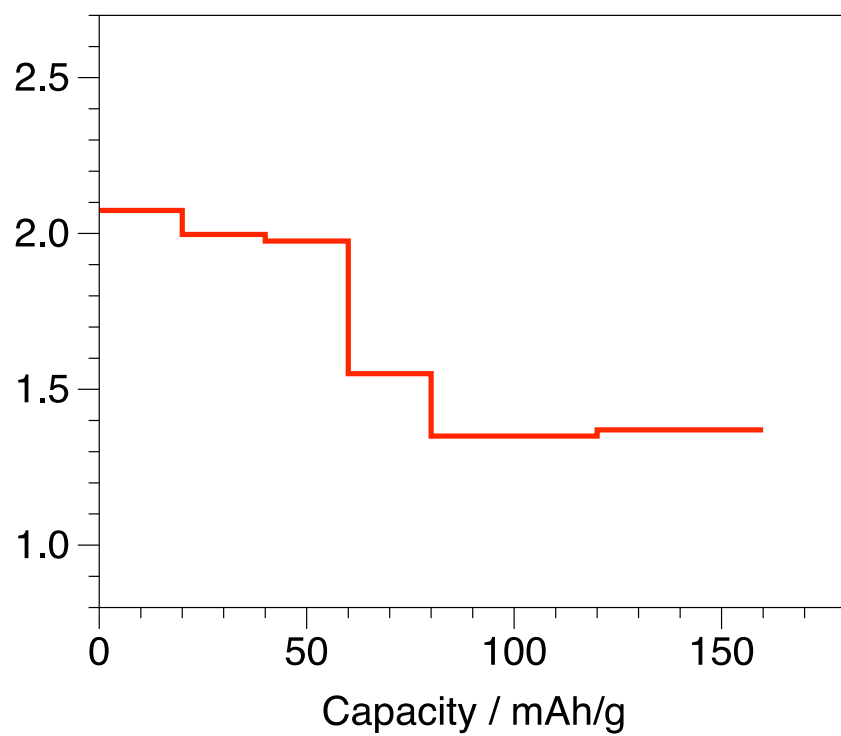

**Figure S1.** The simulated voltage discharge profile of Rutile VO<sub>2</sub>

### Electrolyte-electrode optimization

VO<sub>2</sub>(M) half cells were initially assembled using 1M LiTFSI in EC-DMC (1:1 v/v) as electrolyte. The initial discharge capacity obtained at a current rate of C/10 (Theoretical capacity = 323 mAh/g) was 44.8 mAh/g, corresponding to an insertion of Li equivalent to 0.14 per VO<sub>2</sub> unit. **Figure S2** shows the variation of discharge specific capacity of the VO<sub>2</sub> (M) system in a conventional electrolyte at increasing scan rates. The Coulombic efficiency and the low capacity indicated a poor electrochemical behavior of this electrode-electrolyte pair. Further post-mortem analysis showed re-oxidation problem to V<sub>2</sub>O<sub>5</sub> and further dissolution of the material into the electrolyte. Similarly, the VO<sub>2</sub>(R) system at 70 °C had a more severe degradation mechanism that involved the re-oxidation of VO<sub>2</sub> to V<sub>2</sub>O<sub>5</sub> and its further dissolution (or simultaneously) into the electrolyte causing the separator and anode to turn yellow upon cycling. Higher coloration was detected in the R phase due to an accelerated re-oxidation/dissolution at higher temperatures. (**Figure S3**)

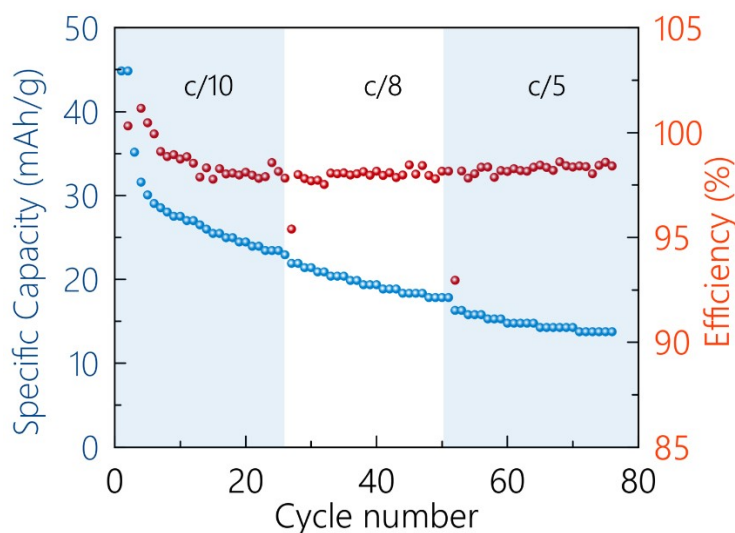

**Figure S2.** Cycling performance of VO<sub>2</sub>(M) at 25 °C in increasing scan rates using a conventional organic electrolyte.

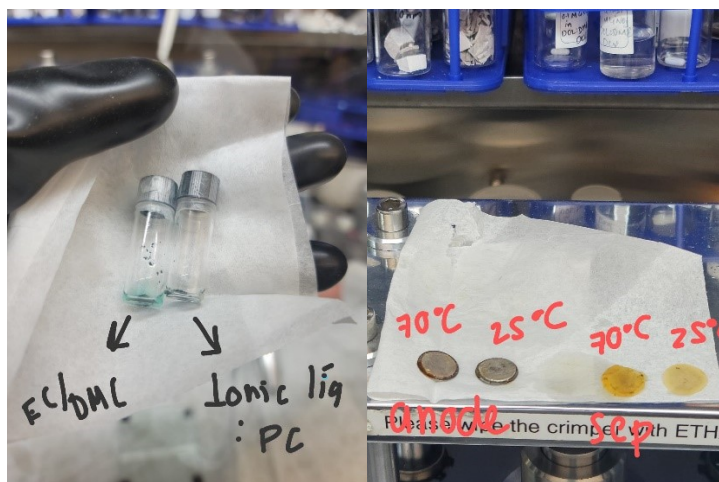

**Figure S3.** Left panel shows the dissolution of  $\text{VO}_2(\text{M})$  into the EC: DMC organic electrolyte system (blue coloration) compared to no coloration in the ionic liquid electrolyte. Right panel shows the re-oxidation of  $\text{VO}_2$  to  $\text{V}_2\text{O}_5$  (characterized by its yellow coloration) and dissolution into the electrolyte at room and elevated temperatures.

Upon optimization of the electrode-electrolyte, a free-standing film electrolyte (based on polymer) was also used since it possesses the advantage of no liquid electrolyte being used, hence reduce the chance of dissolution

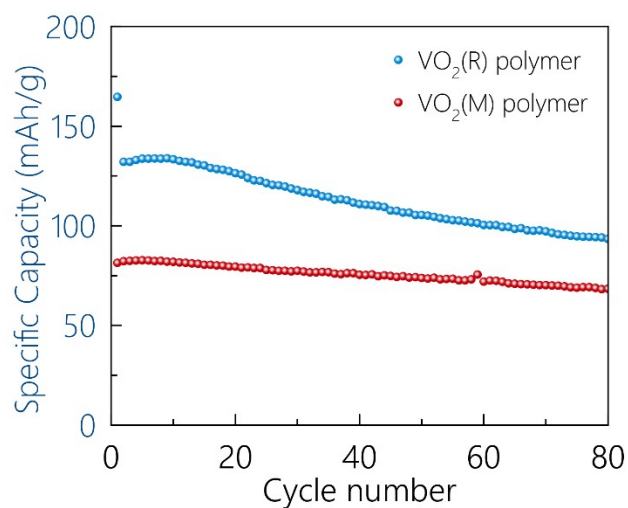

**Figure S4** shows the cycling performance at a scan rate of C/10 for both R and M phase. Compared to the organic electrolyte, the M phase in this electrolyte showed a higher initial capacity of 82 mAh/g and a capacity retention of 81.4% at 80 cycles. The capacity increased in the R phase to 164.6 mAh/g and 126.8 mAh/g in the first and second discharge cycle, but, compared to the M phase, it reached a capacity retention (based on the second cycle) of 80% at the 50<sup>th</sup> cycle and a capacity retention of 66% at 80 cycles.

**Table S1.** Diffusion coefficient at 0.1 mV/s for VO<sub>2</sub>(M) and VO<sub>2</sub>(R)

| Phase | peak     | I <sub>peak</sub> (A)  | E <sub>peak</sub> (V) | D (m <sup>2</sup> /s) |
|-------|----------|------------------------|-----------------------|-----------------------|
| M     | cathodic | 1.22x10 <sup>-04</sup> | 2.37                  | 1.4x10 <sup>-13</sup> |
|       | anodic   | 1.80x10 <sup>-04</sup> | 2.73                  | 3.0x10 <sup>-13</sup> |
| R     | cathodic | 2.50x10 <sup>-04</sup> | 2.44                  | 6.7x10 <sup>-13</sup> |
|       | anodic   | 3.45x10 <sup>-04</sup> | 2.63                  | 1.3x10 <sup>-12</sup> |

### Differential Scanning Colorimetry studies of VO<sub>2</sub>(M) phase at different SOC's

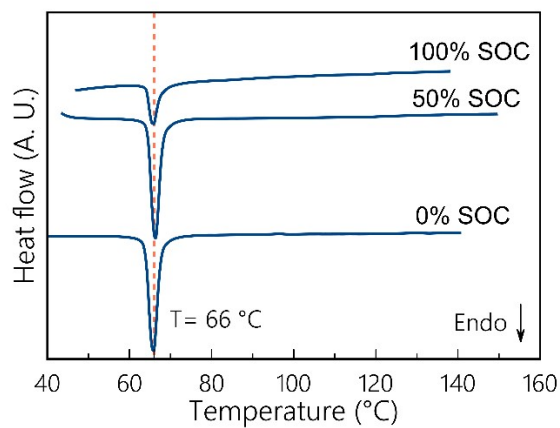

**Figure S5** Displaying the DSC curves for the VO<sub>2</sub>(M) phase at different SOC conditions (lithiated): 0%, 50%, and 100%. Hardly any peak shift is observed for VO<sub>2</sub>(M) samples at 50% and 100% SOC, suggesting that lithiation hardly affects the MTI transition temperature in VO<sub>2</sub>.
